# Supplementary material
Source: Springer Nature journal article supplement (https://www.springermedizin.de/resource/supplementary/12936_2008_604_MOESM3_ESM.pdf/9547804)

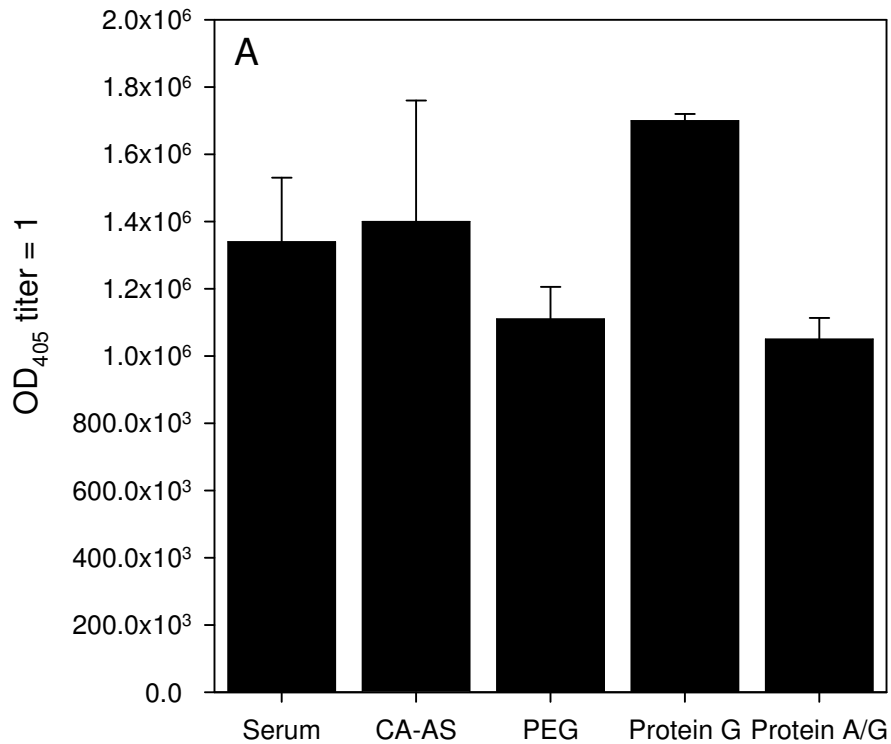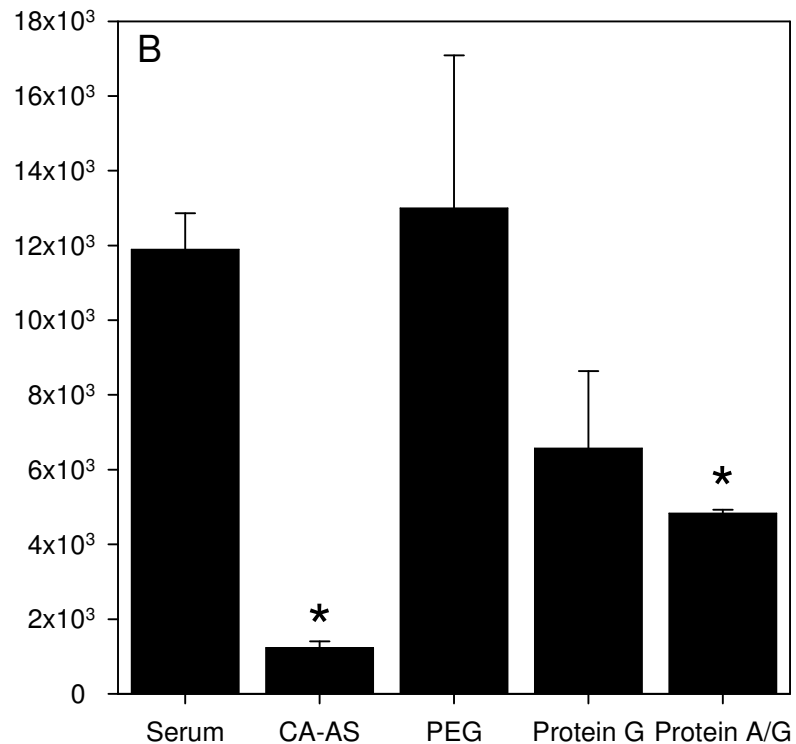

Treatment Groups

Supplement: MOESM3 [file 9547804]
